## **Evaluating digitally-enabled self-experiments in general practice to support patients managing persistent pain**

### **Authors**

Assoc Prof Nancy Sturman MBChB, BA, FRACGP, PhD. General Practice Clinical Unit, The University of Queensland, Australia (corresponding author 1) [n.sturman@uqhealthcare.org.au](mailto:n.sturman@uqhealthcare.org.au) ORCID [0000-0002-7124-5553](https://orcid.org/0000-0002-7124-5553).

Assoc Prof Jane Nikles MBBS PhD. General Practice Clinical Unit, The University of Queensland, Australia

Dr Peter Worthy, PhD, LLB, GDLegalPrac, B.App.Sc.,M. IntDesign. School of Engineering and Computer Science, The University of Queensland, Australia.

Ms Shauna Fjaagesund, MBA, PhD candidate. Health Hub Doctors Morayfield, General Practice Clinical Unit, The University of Queensland, Australia.

Dr Rachel Elphinston, Bsci(Hons), Clinical PhD. RECOVER Injury Research Centre The University of Queensland, Australia. Surgical Treatment and Rehabilitation Service (STARS) Education and Research Alliance, The University of Queensland and Metro North Health, Herston, QLD, Australia

Dr Nicole Andrews BOccThy(Hons), PhD. RECOVER Injury Research Centre The University of Queensland, Australia. The Tess Cramond Pain and Research Centre, Metro North Hospital and Health Service, Australia. Occupational Therapy Department, Metro North Hospital and Health Service, Australia. Surgical Treatment and Rehabilitation Service (STARS) Education and Research Alliance, The University of Queensland and Metro North Health, Herston, QLD, Australia

Prof Michele Sterling, PhD MPhty BPhy Grad Dip Manip Physio FACP. RECOVER Injury Research Centre, NHMRC Centre of Research Excellence: Better Health Outcomes or Compensable Injury, The University of Queensland, Australia. Surgical Treatment and Rehabilitation Service (STARS) Education and Research Alliance, The University of Queensland and Metro North Health, Herston, QLD, Australia

Dr Stefan Konigorski, Dr. rer. nat., Dipl.-Math., M.Sc. Hasso Plattner Institute for Digital Engineering, University of Potsdam, Germany. (corresponding author 2) [stefan.konigorski@hpi.de](mailto:stefan.konigorski@hpi.de). ORCID [0000-0002-9966-6819](https://orcid.org/0000-0002-9966-6819).

## **Abstract**

### **Background**

Despite somewhat limited evidence, non-pharmacological, self-management interventions are often recommended for general practice patients with persistent pain. StudyU is an open-source digital platform designed to help patients undertake self-experiments, using a single case experimental design, to test whether these interventions are personally effective.

### **Aim**

To investigate the feasibility and acceptability of integrating digitally-enabled self-experiments in the general practice care of patients with persistent pain.

### **Design and setting**

We will recruit 50 patients from a large Australian general practice. Participants trial a self-selected, self-management intervention (such as a physical activity, mindfulness practice, or online, self-guided cognitive behavioural therapy) approved by their general practitioner (GP), and use the StudyU app to rate the daily impact of their pain over the 10-week study period. The primary clinical outcome of the self-experiments is mean difference in pain interference (measured using the modified Brief Pain Inventory) between baseline (usual routine) and intervention conditions. Clinical reports are generated for the patient and their GP.

### **Method**

We use validated measures of app usability and acceptance, pre/post measures of patient self-efficacy, quality of life, health service use and self-reported health, individual interviews informed by Normalisation Process Theory, and a nested process evaluation to examine the feasibility and acceptability for patients and practice staff of embedding these self-experiments in general practice care.

### **Conclusion**

Digitally-enabled self-experiments testing non-pharmacological treatment effectiveness may empower patients to self-manage persistent pain, in partnership with their GPs, and provide a model for integrating other new technology for patients with other chronic conditions.

### **KEYWORDS**

General practice, n-of-1 trials, pain, single case experimental designs, mHealth, self-management

It is made available under a [CC-BY-NC-ND 4.0 International license](#) .

## HOW THIS FITS IN

In spite of somewhat limited evidence, non-pharmacological, self-management interventions are generally recommended for general practice patients with persistent pain, a distressing and costly condition. Digitally-enabled single-case experimental designs may be a useful approach to assessing the individual effectiveness of self-management interventions. This research will provide evidence about the acceptability and feasibility (for patients, clinicians and other practice staff) of integrating digitally enabled self-experiments into general practice care.

## INTRODUCTION

### *Persistent pain*

Innovative and practical solutions are needed to address the costly and distressing problem of persistent (or chronic) non-cancer pain. Living with persistent pain is often a disempowering and lonely journey, associated with substantial disability<sup>1</sup> and healthcare system cost.<sup>2</sup> Persistent pain also presents challenges for general practice, including navigating ongoing compensation and insurance matters, and patient dependence on pharmacological interventions.<sup>3</sup> Although non-pharmacological, self-management options for managing pain are often recommended, identifying whether these treatments actually help individual patients is often difficult. In this study, we use a mobile phone app<sup>4</sup> which enables patients to test the effectiveness of a self-management intervention of their choice.

### *Apps in general practice*

Apps are used in general practice to improve consumer adherence<sup>5</sup>, monitor symptoms<sup>6</sup>, supplement medical histories<sup>7</sup>, and implement management algorithms.<sup>8</sup> Many Australian general practitioners (GPs) regularly recommend apps to their patients.<sup>9</sup> However, GPs also perceive barriers to effectively adopting evidence-based apps, including limited awareness of suitable apps, and concerns about time commitment, privacy, safety, and trustworthiness.<sup>9</sup> Australian patients appear less concerned than GPs about privacy and data safety issues, and appreciate their doctors recommending evidence-based apps.<sup>10</sup> In international literature, workflow adjustments, inadequate reimbursement and high training effort are substantial barriers for digital health adoption in general practice, whereas interoperability, integration with workflow, continued technical support, improved usability, digital formularies, payment models and attention to personal and emotional elements facilitate uptake.<sup>11, 12</sup> The engagement of both health professionals and patients is essential for successful integration.<sup>10</sup>

### *Digitally enabled self-experiments: StudyU*

The open access StudyU health app is a new, cost-free, mobile phone app for conducting Single Case Experimental Designs (personalised, single patient self-experiments using patients as their own controls).<sup>13</sup> In this study we use the app to enable patients with persistent pain to evaluate the effectiveness of treatments. We have piloted the app with four community-based consumers with persistent pain. The app is embedded in the StudyU platform<sup>4</sup>, which also includes a general-use tool for researchers and healthcare practitioners to design, monitor and manage these patient self-experiments.

The StudyU app generates daily reminders for patients to undertake their chosen activity, and rate pain severity and impact, over a 10-week test period. After patients complete their self-experiments, the app produces simple

It is made available under a [CC-BY-NC-ND 4.0 International license](#) .

visual displays of daily ratings, and average baseline versus intervention ratings, using colour-coded bar graphs. The research team will also analyse outcomes using Bayesian linear mixed models to compare baseline and intervention conditions, producing clinical reports which are forwarded by a secure messaging system to the patient and their GP. StudyU does not require a user account and does not store any personal identifying data. Non-identifiable data will be shared with Hasso Plattner Institute's server in Germany to contribute to an open worldwide data repository, with patient consent. This will further drive development of open science approaches, allow aggregation of single case experiments testing similar interventions in future, and inform the design of future trials.

## **Aim**

The main aim of this research is to test the feasibility and acceptability of integrating digitally-enabled self-experiments into general practice, which test the effectiveness of non-pharmacological treatments in reducing the impact of persistent non-cancer pain. Our goal is to empower patients and their treating teams to adopt effective self-management activities and discontinue treatments which are ineffective for them personally (even if these are generally recommended).

## **Research question**

Is it feasible, acceptable and useful to embed digitally-enabled self-experiments into a general practice setting, for patients with persistent pain?

## **METHOD**

### ***Design***

#### ***Setting and Participants***

The study is conducted in a large privately-owned general practice north of Brisbane (Health Hub Doctors Morayfield). The practice serves a predominantly low socio-economic patient demographic, and has a commitment to practice-based research that improves patient care in their community. There were 5,516 presentations for pain as the primary reason for attendance in 2020-2021 at the practice. The practice team has worked with us to design operational procedures which embed StudyU-enabled self-experiments in chronic disease and pain management consultation workflows and systems. We will recruit four GPs, four practice nurses and up to 50 patients with a diagnosis of persistent pain, and estimate that 30 patients will complete the study, an acceptable number for a feasibility study.<sup>14</sup>

It is made available under a [CC-BY-NC-ND 4.0 International license](https://creativecommons.org/licenses/by-nc-nd/4.0/) .

Inclusion criteria:

1) >18 years, 2) currently experiencing clinically significant persistent pain for 3 months or longer, most days per week (average pain severity in last week of at least 3-4/10), 3) on stable dose/s of regular pain medication (including medicinal cannabis) for  $\geq$  4 weeks prior, or not currently taking pain medication.

A sub-group of participants will be recruited with an additional inclusion criterion of

5) persistent neck and/or back pain following a road traffic crash at least 3 months prior to recruitment.

Exclusion criteria:

1) acute mental health disorder or suicidal, 2) unable to use digital health apps due to impairments in cognition, vision or dexterity 3) non-English speaking, 4) no access to smartphone or Internet, 5) recent (in last 4 weeks) or planned (in the next 3 months) changes to current pain management interventions, including surgery.

### Research Plan

A patient flyer about the study, and a one-page explanatory information sheet, will be displayed in practice waiting areas, and consulting rooms. Study GPs and/or practice nurses will provide further information to patients who express an interest in participating, screen them for study eligibility, invite eligible patients to provide written, informed consent to participate, assist patients to select a suitable non-pharmacological intervention, and complete study referral information. See Figure 1 for an overview of participant flow and study design.

### Intervention

A research assistant embedded within the participating general practice will prepare, and regularly update, a list of low-cost activities which are generally recommended for the management of persistent pain and are locally available at low or no cost to practice patients. The activities are reviewed by a pain clinician to ensure they are generally appropriate. The list includes mindfulness practice, online pain management modules, low impact exercise such as chair yoga, tai chi, walking programs (self-managed or group), and personalised or small group exercise programs. The patient selects an activity from this list, with the approval of their GP. On receipt of the study referral, which is generated and auto-populated from existing practice software, the research assistant designs a personalised self-experiment for each patient using the StudyU designer, and forwards an invitation code to the patient, for them to enter into the StudyU app to commence their personalised self-experiment

It is made available under a [CC-BY-NC-ND 4.0 International license](https://creativecommons.org/licenses/by-nc-nd/4.0/) .

Patients are assisted by the study team or practice nurses to download the StudyU app and enter their personalised invitation code, if required. The patient's self-experiment will continue for a total of 10 weeks, using an A<sup>1</sup>-B-A<sup>2</sup> single case experiment design, where Phase A<sup>1</sup> is of the patient's usual or typical routine, Phase B is 6 weeks undertaking the intervention activity, and Phase A<sup>2</sup> is resumption of usual routine (except for patients who wish to continue the intervention activity).

Weekly phone calls from the study team will support patients with any issues that may arise, and encourage them to complete their self-experiment and study follow-up. After the patient has completed their study, they will be encouraged to book a consultation with their GP to discuss study results. This consultation will include shared decision-making about whether or not to continue the activity. Patients may also choose to conduct a second self-experiment with another activity.

Gift vouchers will be provided to practice nurses to reimburse them for time spent recruiting and assisting patients. Study nurses and GPs will also be reimbursed for attendance at a training session to familiarise them with study rationale and procedures, and participating in individual interviews at study completion. Gift vouchers will be provided to patients to reimburse them for the initial study visit, survey completion and post-study interviews.

### Outcome measures

The primary clinical outcome measured daily in the app-enabled self-experiments is pain interference, using the modified Brief Pain Inventory 7-item interference subscale.<sup>15</sup> A change of 1 point over the average of the 7 items is clinically significant.<sup>16</sup> The secondary clinical outcomes are pain intensity, using a Visual Analog Scale<sup>17</sup>, and number of additional treatments for pain flare-ups. All clinical outcomes are measured in the StudyU app.

In addition to these clinical outcomes, patients will also complete validated measures at baseline, and 4 weeks following their self-experiment, of self-efficacy, mental health, self-reported health, health service use, disability and quality of life (see Box 1 for full list of instruments used). We will examine the feasibility and acceptability of integrating digitally-enabled self-experiments over the 12-18 months study duration, using a nested process evaluation, and structured individual interviews, informed by Normalisation Process Theory<sup>18</sup>, with study GPs and practice nurses following study completion. Patients will complete measures of technology acceptance and usability (see Box 1) and participate in structured interviews after their self-experiments, exploring their experiences. Feasibility outcome measures include number of participants recruited and retained, and self-experiment completion rate. All management decisions and reasons for drop-out will be recorded, and the research team will record memos of each weekly phone call with patient participants. Outcome measures are summarised in Box 1.

### Analyses

Descriptive statistics will summarise usability, usefulness, acceptability and feasibility outcomes. For the clinical reports, we will use t-tests to compare average daily scores of primary and secondary clinical outcomes between usual routine and intervention phases. Bayesian linear mixed models will be used to calculate the posterior probability that the intervention is effective for the individual level, at the pre-determined meaningful effect size. It may be possible to perform these analyses at an aggregate level across patients, if multiple participants test the same intervention. All analyses will be performed using the statistical software R. Structured interviews will be transcribed and analysed thematically using template analysis.<sup>19</sup>

## **DISCUSSION**

### **Strengths**

General practitioner-led, practice-based clinical research in general practice settings is widely recognised as one of the key avenues for building a strong, fit-for-purpose general practice evidence base. This project will contribute towards personalising the self-management of persistent pain, providing patients with evidence about the effectiveness for them personally of a chosen intervention, and empowering them to adopt effective self-management activities in partnership with their GP. Single case experimental designs provide much more robust evidence of intervention effectiveness than “try it and see” approaches.<sup>20</sup> We anticipate that the use of the StudyU app will facilitate adherence to the planned intervention and to collecting evidence of its effectiveness, and will enhance patient self-efficacy in relation to the self-management of their pain. We have addressed several known barriers to integration into general practice care, by embedding the self-experiments in existing practice workflows and systems, and facilitating patient referrals into locally accessible and affordable community-based services and activities.

### **Limitations**

The relatively short duration of the self-experiments limits our ability to detect any intervention effect with a delay in onset longer than 3-4 weeks, and we have not included blocks to account for wash-in or wash-out effects of the interventions. The ABA phase design is also more limited than a design including more phases, in assessing intercurrent external factors which may impact on the patients’ pain over the study period. However, we exclude patients with recent or intercurrent changes in other pain management interventions, or with cancer pain (which may be progressive). Limitations can be discussed during the follow-up GP-patient consultation, and future



It is made available under a [CC-BY-NC-ND 4.0 International license](#) .

studies could optimise the length and design of trials for particular interventions. We are also testing StudyU-enabled self-experiments in a relatively small study in a single practice that is already research-friendly and has provided funds to support the initial pilot; other practices may have additional barriers to successfully integrating StudyU into clinical care.

### **Implications for practice**

In addition to the clinical benefits for individual patients of identifying effective (or ineffective) treatments, study findings about the feasibility, acceptability and usefulness of integrating these digitally-enabled self-experiments for patients with persistent pain may provide a model for integrating other technology and single case experimental designs into the general practice care of patients with other chronic conditions.

**Funding:** Royal Australian College of General Practitioners Foundation, Medibank Better Health Foundation and Motor Accident Insurance Commission Qld have generously funded this study. MS receives a fellowship from the NHMRC (APP2017405) and receives unrestricted funding from the Motor Accident Insurance Commission of Qld.

**Ethical approval:** The University of Queensland Human Research Ethics Committee 2023/HE000039.

**Australia and New Zealand Clinical Trials Registry:** ACTRN12624000459527

**Competing interests:** Jane Nikles has a commercial interest in N-of-1 Hub Pty Ltd consultancy company.

**Acknowledgements:** We acknowledge Health Hub Doctors Morayfield, in particular Assoc Prof Evan Jones, Dr Shahab Sojoudi Haghghi, Dr Sam Hariri, and Dr Jeremy So, for their support and enthusiasm for this research, and our funders, the Royal Australian College of General Practitioners Foundation, Medibank Better Health Foundation and the Motor Accident Insurance Commission. We acknowledge Dr Suzanne McDonald for advice and input.

**Summary of Outcomes Measures (Box 1)**

| Outcome type              | Outcome measures                                                                                                                                                                                                                                                                                                                                |                                                                                                                                                                                                                                                                                                                                                                                                                                                                                                                                                                                                                                                                                                                                                                                                                |
|---------------------------|-------------------------------------------------------------------------------------------------------------------------------------------------------------------------------------------------------------------------------------------------------------------------------------------------------------------------------------------------|----------------------------------------------------------------------------------------------------------------------------------------------------------------------------------------------------------------------------------------------------------------------------------------------------------------------------------------------------------------------------------------------------------------------------------------------------------------------------------------------------------------------------------------------------------------------------------------------------------------------------------------------------------------------------------------------------------------------------------------------------------------------------------------------------------------|
| Clinical outcome measures | <p>Primary clinical outcome:</p> <ul style="list-style-type: none"> <li>Pain interference (modified Brief Pain Inventory interference subscale)<sup>15</sup></li> </ul>                                                                                                                                                                         | <p>Secondary clinical outcomes:</p> <p>Measured in StudyU app</p> <ul style="list-style-type: none"> <li>Pain severity<sup>17</sup></li> <li>Use of additional pain medications</li> </ul> <p>Measured pre and post self-experiment</p> <ul style="list-style-type: none"> <li>Pain self-efficacy (Pain Self-efficacy Questionnaire)<sup>21</sup></li> <li>Depression, anxiety, and stress (Depression Anxiety Stress Scale)<sup>22</sup></li> <li>Health-related quality of life (Kemp QOL scale)<sup>23</sup></li> <li>Self-reported health</li> <li>Self-reported emergency department presentations in previous 3 months.</li> <li>In patients with persistent neck or back pain following a road traffic crash: Neck Disability Index<sup>24</sup> and Oswestri Disability Index.<sup>25</sup></li> </ul> |
| Evaluation of StudyU App  | <p>Surveys</p> <ul style="list-style-type: none"> <li>Technology usability, usefulness and acceptance (one-question System Usability Scale)<sup>26</sup></li> <li>Acceptability of StudyU (Unified Theory of Acceptance and Use of Technology)<sup>27</sup></li> </ul>                                                                          | <p>Semi-structured interviews with participants during follow-up to:</p> <ul style="list-style-type: none"> <li>document their experience with, and feedback on, the App</li> <li>assess any perceived impact on their pain self-management, and</li> <li>assess concordance of post-SCED behaviour with StudyU results</li> </ul>                                                                                                                                                                                                                                                                                                                                                                                                                                                                             |
| Evaluation of Pilot       | <p>Feasibility and acceptability outcomes:</p> <ul style="list-style-type: none"> <li>Number of participants recruited and retained</li> <li>Baseline/post-intervention response rates</li> <li>Number of SCED trials completed, and reasons for drop-out</li> <li>Practice staff, GP and patient satisfaction with SCED and StudyU.</li> </ul> | <p>Process evaluation</p> <ul style="list-style-type: none"> <li>Structured interviews using Normalisation Process Theory<sup>18</sup></li> <li>4 GPs, 4 practice nurses and 10 patient participants to examine implementation barriers and enablers.</li> </ul>                                                                                                                                                                                                                                                                                                                                                                                                                                                                                                                                               |

## References

1. Vos T. Global, regional, and national incidence, prevalence, and years lived with disability for 328 diseases and injuries for 195 countries, 1990-2016: a systematic analysis for the Global Burden of Disease Study 2016. *The Lancet* 2017;388(10053):1545-1602.
2. Deloitte Access Economics. The cost of pain in Australia, 2019. Available from: <https://www2.deloitte.com/au/en/pages/economics/articles/cost-pain-australia.html>.
3. Mills S, Torrance N, and Smith B. Identification and Management of Chronic Pain in Primary Care: a Review. *Curr Psychiatry Rep.* 2016; 18: 22.
4. Konigorski S, Wernicke S, Slosarek T et al (2020). StudyU: a platform for designing and conducting innovative digital N-of-1 trials. *J Med Internet Res* 24(6): e35884. 10.2196/35884.
5. Redfern J, Coorey G, Mulley J et al. A digital health intervention for cardiovascular disease management in primary care (CONNECT) randomized controlled trial. *NPJ Digit Med.* 2020 Sep 10:3:117.
6. Rudin R, Fanta C, Qureshi N et al. A Clinically Integrated mHealth App and Practice Model for Collecting Patient-Reported Outcomes between Visits for Asthma Patients: Implementation and Feasibility. *Appl Clin Inform.* 2019 Oct;10(5):783-793.
7. Albrink K, Schröder D, Joos C, et al. Usability of an App for Medical History Taking in General Practice From the Patients' Perspective: Cross-Sectional Study. *JMIR Hum Factors.* 2024 Jan 5:11:e47755.
8. Robinson B, Proimos E, Zou D et al. Functionality and Quality of Asthma mHealth Apps and Their Consistency With International Guidelines: Structured Search and Evaluation *JMIR Mhealth Uhealth.* 2024 Jan 10:12:e47295.
9. Byambasuren O, Beller E, Glasziou P. Current Knowledge and Adoption of Mobile Health Apps Among Australian General Practitioners: Survey Study. *JMIR Mhealth Uhealth.* 2019 Jun 3;7(6):e13199.
10. Byambasuren O, Beller E, Hoffmann T et al. Barriers to and Facilitators of the Prescription of mHealth Apps in Australian General Practice: Qualitative Study. *JMIR Mhealth Uhealth.* 2020 Jul 30;8(7):e17447. doi: 10.2196/17447.
11. Weik L, Fehring L, Mortsiefer A et al. Understanding inherent influencing factors to digital health adoption in general practices through a mixed-methods analysis. *NPJ Digit Med.* 2024; 7: 47.
12. Gordon W, Landman A, Zhang H et al. Beyond validation: getting health apps into clinical practice *NPJ Digit Med.* 2020; 3:14.

It is made available under a [CC-BY-NC-ND 4.0 International license](https://creativecommons.org/licenses/by-nc-nd/4.0/) .

13. Krasny-Pacini A and Evans J. Single-case experimental designs to assess intervention effectiveness in rehabilitation: A practical guide. *Annals of Physical and Rehabilitation Medicine* 61(3), Pages 164-179.
14. Eldridge SM, Chan CL, Campbell MJ et al. CONSORT 2010 statement: extension to randomised pilot and feasibility trials. *BMJ* 2016; 355:i5239.
15. Cleeland CS, Ryan KM. Pain assessment: global use of the Brief Pain Inventory. *Ann Acad Med Singapore* 1994;23(2):129-138.
16. Dworkin R, Turk D, Wyrwich K et al. Consensus statement: Interpreting the Clinical Importance of Treatment Outcomes in Chronic Pain Clinical Trials: IMMPACT Recommendations. *The Journal of Pain* 2008 9(2):105-121.
17. Gould D et al. Visual Analogue Scale (VAS). *Journal of Clinical Nursing* 2001; 10:697-706.
18. Murray E, Treweek S, Pope C et al. Normalisation process theory: a framework for developing, evaluating and implementing complex interventions. *BMC Medicine* volume 8, Article number: 63 (2010).
19. King N, Brooks J. SAGE Handbook of Qualitative Business and Management Research Methods: Methods and Challenges. 2018.
20. Epstein L and Dallery J. The Family of Single-Case Experimental Designs. *Harv Data Sci Rev* 9 Sept 2022.
21. Dubé MO, Langevin P and Roy JS. Measurement properties of the Pain Self-Efficacy Questionnaire in populations with musculoskeletal disorders: a systematic review. *AIN Reports*: November/December 2021. 6(4):e972.
22. Lovibond, S.H. & Lovibond, P.F.(1995). Manual for the Depression Anxiety Stress Scales (2nd. Ed.). Sydney: Psychology Foundation.
23. Siebens H, Tsukerman D, Adkins R et al. Correlates of a Single-Item Quality-of-Life Measure in People Aging with Disabilities. *Am J Phys Med Rehabil.* 2015 Dec; 94(12): 1065–1074.
24. Vernon H, Mior S. The Neck Disability Index: a study of reliability and validity. *J Manip Physiol Therap.* 1991;14,409-415.
25. Fairbank J, Pynsent P. The Oswestry Disability Index. *Spine* 2000;25:2490-53.
26. Sauro, J., & Dumas, J. S. (2009, April). Comparison of three one-question, post-task usability questionnaires. In *Proceedings of the SIGCHI conference on human factors in computing systems* (pp. 1599-1608).

It is made available under a [CC-BY-NC-ND 4.0 International license](#) .

27. Venkatesh V, Thong J, and Xu X (2012). Consumer acceptance and use of information technology: extending the unified theory of acceptance and use of technology. *MIS quarterly*, 157-178.

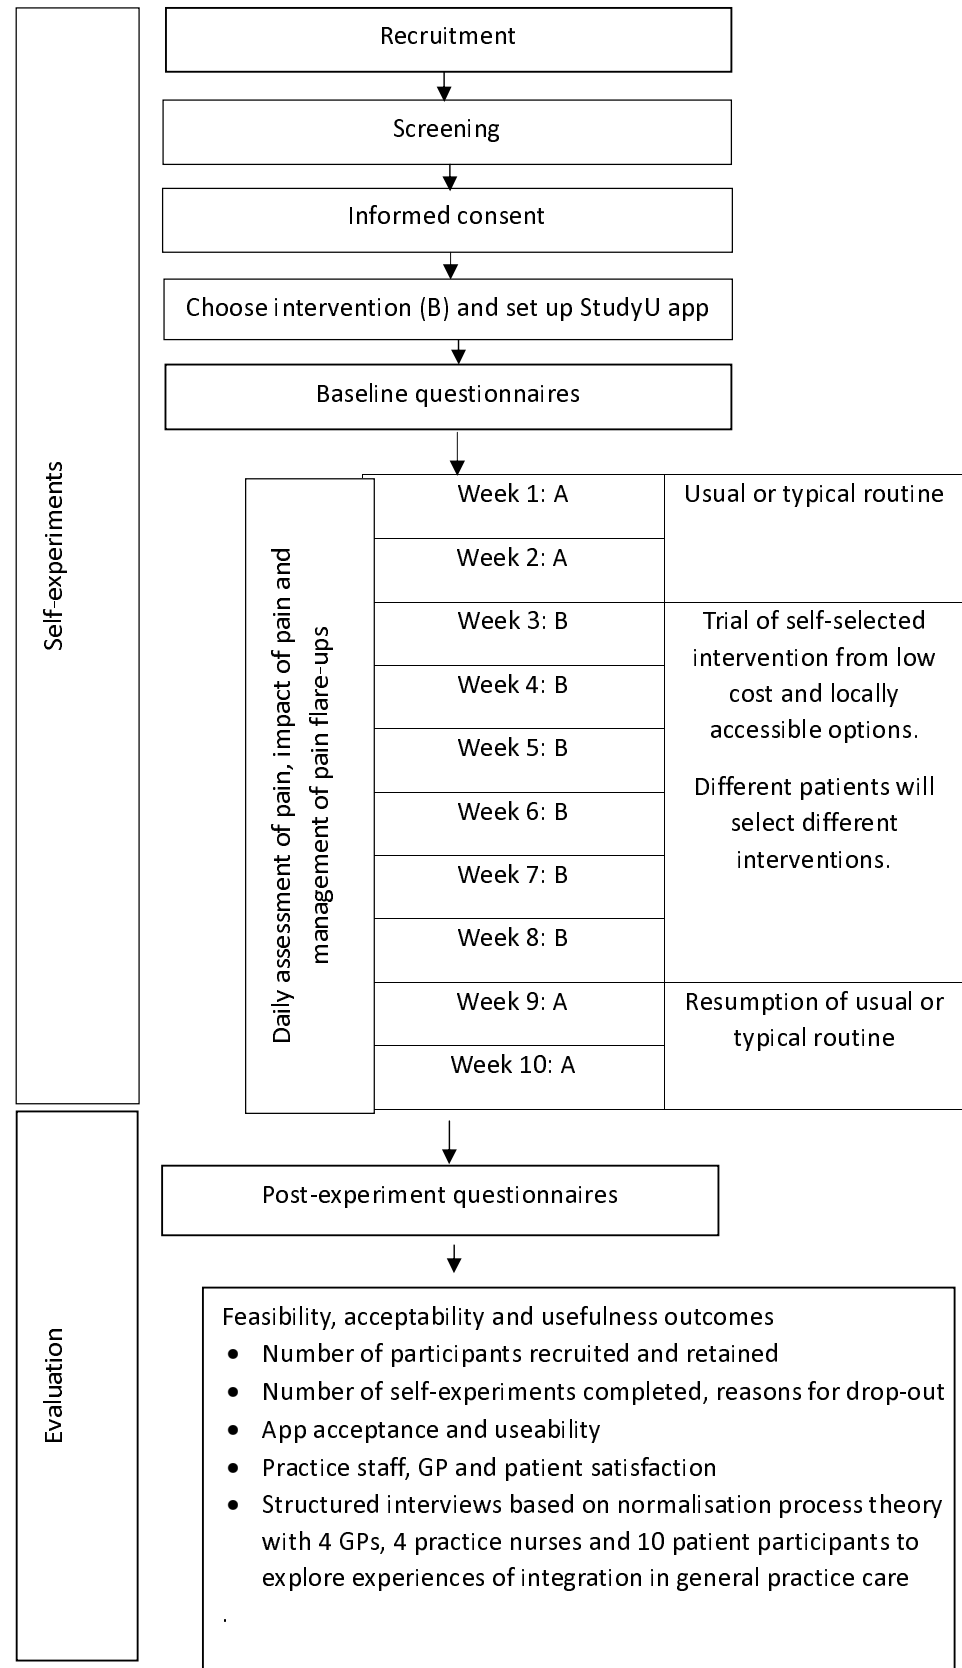

Fig 1. Overview of participant flow and study design.
